# Supplementary material for: Surface state modulation of red emitting carbon dots for white light-emitting diodes
Source: Royal Society of Chemistry journal article supplement (doi:10.1039/c8tc04468f), 2018-01-01
Supplement: c8tc04468f1.pdf [file c8tc04468f1.pdf]

## Surface states modulation of red emitting carbon dots for white light-emitting diode

Kang Yuan<sup>†</sup>, Xinghua Zhang<sup>†,\*</sup>, Ruohan Qin<sup>†</sup>, Xuefeng Ji<sup>†</sup>, Yahui Cheng<sup>‡</sup>, Lanlan Li<sup>†</sup>,  
Xiaojing Yang<sup>†</sup>, Zunming Lu<sup>†</sup>, Hui Liu<sup>§,\*</sup>

<sup>†</sup>School of Materials Science and Engineering, Hebei University of Technology, Tianjin 300130,  
China

<sup>‡</sup>Department of Electronics, Nankai University, Tianjin 300350, China

<sup>§</sup>School of Materials Science and Engineering, Tianjin University, Tianjin 300072, China

### Supporting information

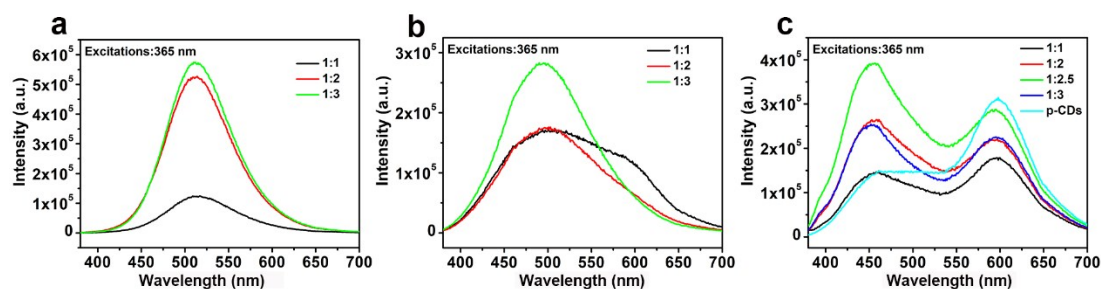

**Figure S1.** Fluorescence emission spectra of CDs with different molar ratios of raw materials excited by 365 nm. (a) Fluorescence emission spectra of EDA-CDs with different molar ratios of PDDA to EDA. (b) Emission spectra of PEI-CDs with different molar ratios of PDDA to PEI. (c) Fluorescence emission spectra of pro-CDs with different molar ratios of PDDA to L-proline.

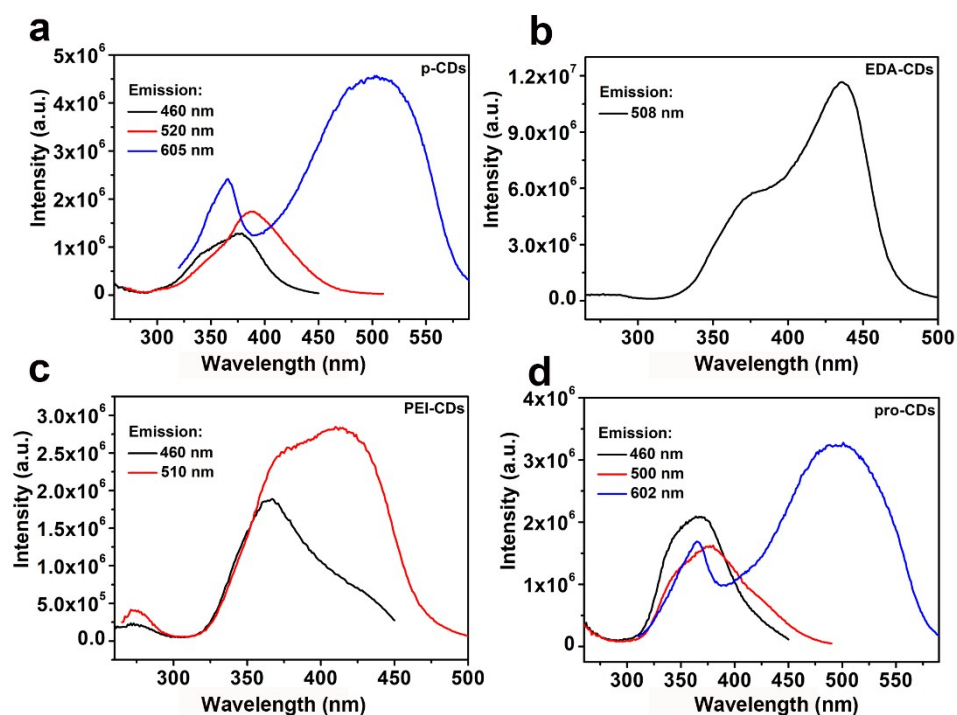

**Figure S2.** Fluorescence excitation spectra of (a) p-CDs, (b) EDA-CDs, (c) PEI-CDs, (d) pro-CDs.

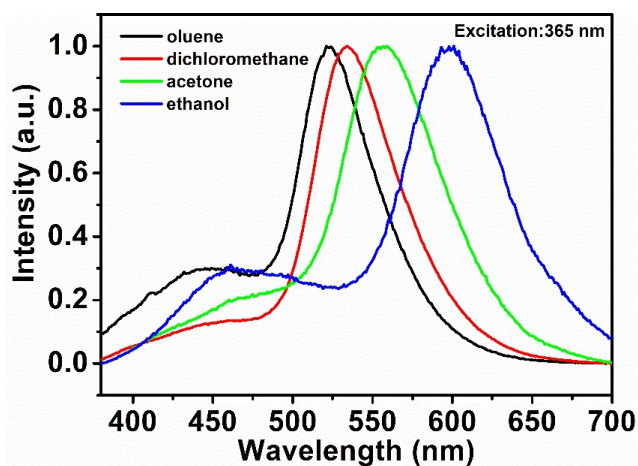

**Figure S3.** Photoluminescence spectra of the p-CDs in different solvents excited by 365 nm.

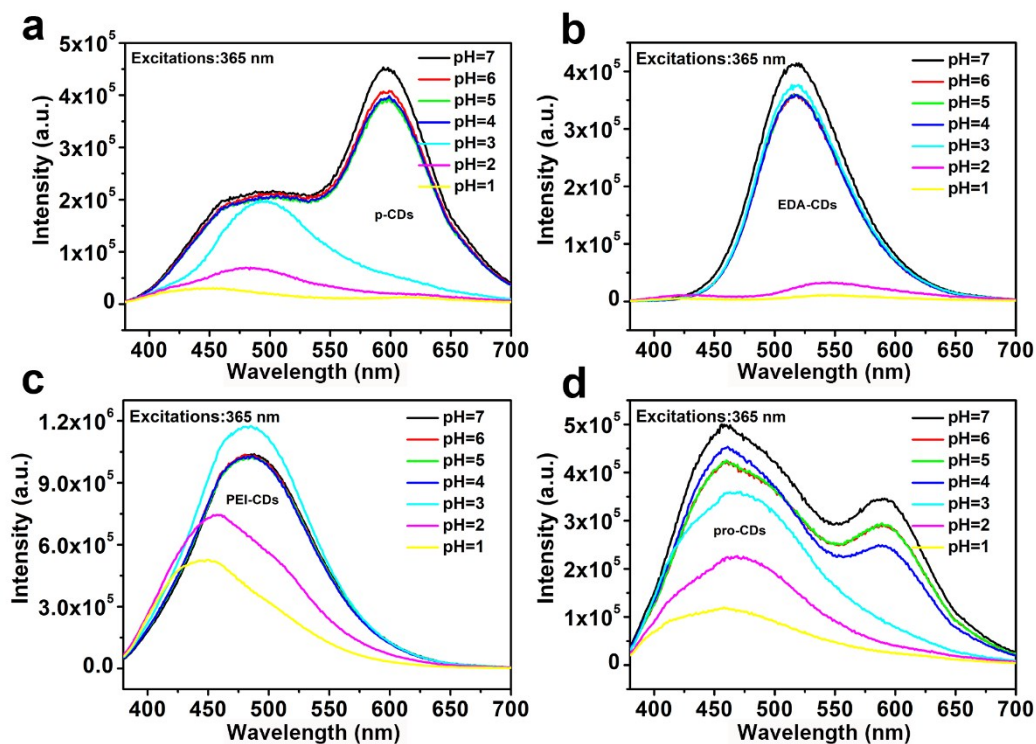

**Figure S4.** Emission spectra of the four CDs by changing pH values (1–7) with addition of HCl.

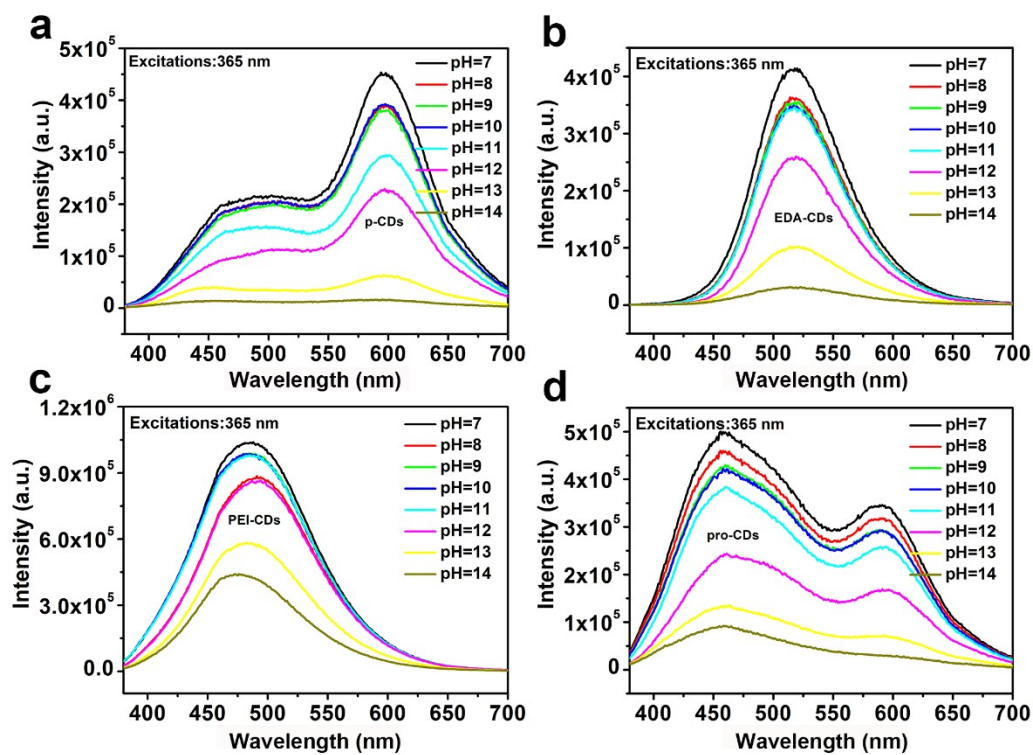

**Figure S5.** Emission spectra of the four CDs by changing pH values (7–14) with addition of NaOH.

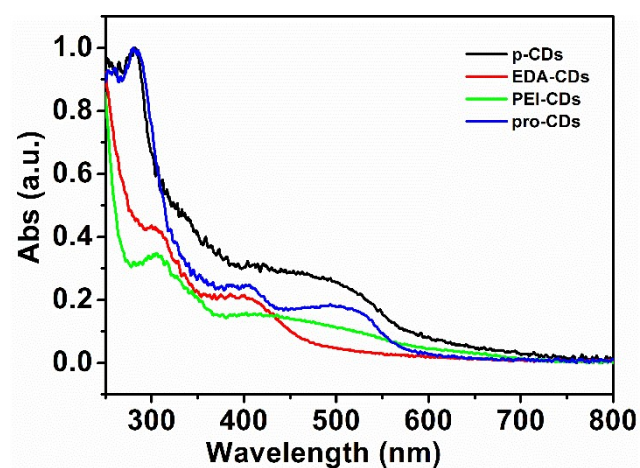

**Figure S6.** The UV-Vis absorption spectra of p-CDs, EDA-CDs, PEI-CDs and pro-CDs, respectively.

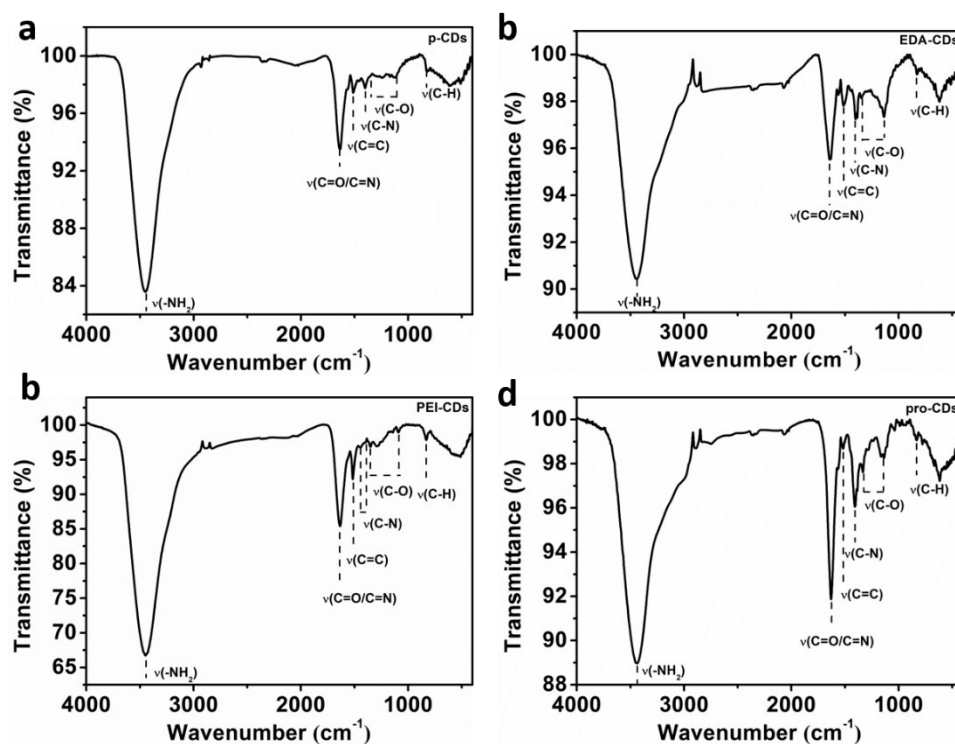

**Figure S7.** FTIR spectra of (a) p-CDs, (b) EDA-CDs, (c) PEI-CDs and (d) pro-CDs, respectively.

**Table S1.** The atomic percent of four kinds of CDs.

|         | C (atm. %) | N (atm. %) | O (atm. %) |
|---------|------------|------------|------------|
| p-CDs   | 84.60      | 4.76       | 9.50       |
| EDA-CDs | 70.33      | 17.54      | 10.34      |
| PEI-CDs | 70.64      | 12.85      | 12.45      |
| pro-CDs | 73.30      | 11.13      | 14.58      |

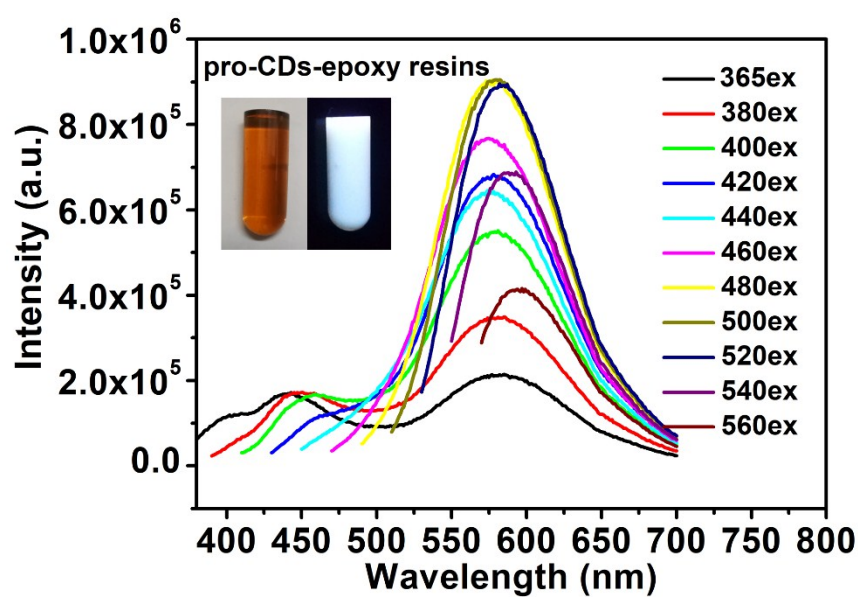

**Figure S8.** Fluorescence emission spectra of pro-CDs in epoxy resins under various excitation wavelengths, insets show the photograph of the pro-CDs in epoxy resins under natural light (left) and 365 nm excitation (right).
